# Supplementary material
Source: PubMed Central journal article supplement (PMC4597271)

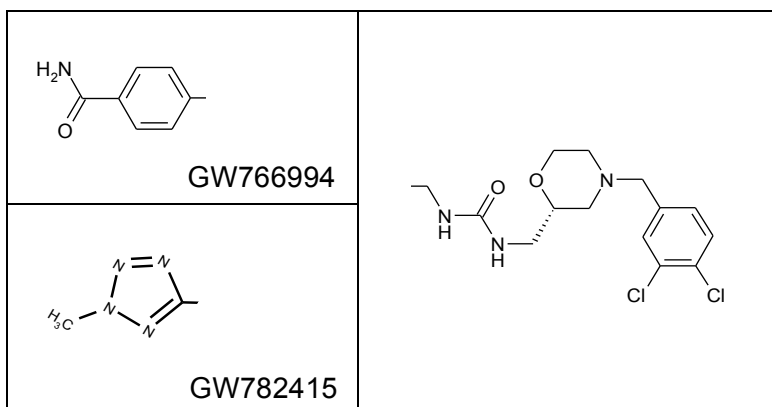

**Supplemental Figure 1. Chemical structures of GW766994X and GW782415X.**

Supplement: mmc1.pdf [file mmc1.pdf]
